# Supplementary material
Source: Research Square preprint supplement (doi:10.21203/rs.3.rs-8781933/v1)
Supplement: Supplementary file 1 [file 36cf586f61652b7f60ccbf68.docx]

***Supporting Information***

**Environmental Distribution of Polycyclic Aromatic Hydrocarbons in Fire Stations: High-Risk Surfaces in Vehicles and Personal Protective Equipment**

Jiwoon Kwona,*, Won Kimb, Inja Choib

a National Fire Research Institute of Korea, 31555 Songak-ro, Songak-myeon, Asan-si, Chungcheongnam-do, Republic of Korea

b Wonjin Institute for Occupational and Environmental Health, 53 Sagajeong-ro 49-gil, Jungnang-gu, Seoul, Republic of Korea

Corresponding author at: Department of Fire Policy Research, National Fire Research Institute of Korea.

E-mail address: jkwon7@korea.kr (J. Kwon).

The supporting information is eleven pages containing eleven tables.

Table S1. Abbreviations and results of recovery tests and limit of detections of PAHs in wipe samples. SD=standard deviation. RE=recovery efficiency. RSD=relative standard deviation.

| Compound |  | Spiked amount (22.2 ng) | | | | Spiked amount (44.3 ng) | | | | Limit of detection (ng) |
| --- | --- | --- | --- | --- | --- | --- | --- | --- | --- | --- |
|  |  | Mean (ng) | SD (ng) | RE (%) | RSD (%) | Mean (ng) | SD (ng) | RE (%) | RSD (%) |  |
| Naphthalene* | NAP |  |  |  |  |  |  |  |  | 0.14 |
| Acenaphthylene | ACE | 17.4 | 4.3 | 78.6 | 24.5 | 45.3 | 4.5 | 102.0 | 10.0 | 0.20 |
| Acenaphthene | ACN | 22.2 | 7.0 | 100.0 | 31.4 | 63.2 | 1.4 | 142.4 | 2.2 | 0.24 |
| Fluorene | FLU | 17.8 | 2.4 | 80.3 | 13.7 | 36.6 | 4.0 | 82.6 | 10.8 | 0.11 |
| Phenanthrene | PHE | 16.6 | 1.2 | 74.8 | 7.4 | 42.3 | 1.3 | 95.3 | 3.1 | 0.10 |
| Anthracene | ANT | 21.2 | 1.5 | 95.7 | 7.2 | 43.7 | 2.9 | 98.5 | 6.7 | 0.10 |
| Fluoranthene | FLT | 30.4 | 1.0 | 136.9 | 3.3 | 57.8 | 1.8 | 130.3 | 3.1 | 0.12 |
| Pyrene | PYR | 34.8 | 1.6 | 157.0 | 4.7 | 62.9 | 3.3 | 141.9 | 5.3 | 0.16 |
| Benz[a]anthracene | BaA | 23.8 | 0.9 | 107.1 | 4.0 | 46.6 | 0.7 | 105.0 | 1.5 | 0.14 |
| Chrysene | CHR | 18.6 | 0.5 | 83.8 | 2.6 | 34.4 | 3.0 | 77.5 | 8.6 | 0.13 |
| Benzo[b]fluoranthene | BbF | 22.5 | 0.7 | 101.4 | 3.2 | 39.3 | 3.6 | 88.7 | 9.1 | 0.33 |
| Benzo[k]fluoranthene | BkF | 22.3 | 2.0 | 100.4 | 9.1 | 39.5 | 3.6 | 89.2 | 9.1 | 0.19 |
| Benzo[a]pyrene | BaP | 27.1 | 3.7 | 122.2 | 13.6 | 37.7 | 6.2 | 85.1 | 16.3 | 0.34 |
| 3-Methylcholanthrene | 3-MC | 13.6 | 0.8 | 61.3 | 5.5 | 31.4 | 2.7 | 70.9 | 8.4 | 0.63 |
| Indeno[1,2,3-cd]pyrene | IcdP | 17.7 | 0.7 | 80.0 | 3.9 | 38.1 | 2.9 | 85.9 | 7.6 | 0.30 |
| Dibenz[a,h]anthracene | DBA | 17.6 | 1.3 | 79.4 | 7.4 | 36.3 | 3.6 | 81.8 | 9.8 | 0.17 |
| Benzo[g,h,i]perylene | BghiP | 25.5 | 1.2 | 114.8 | 4.6 | 52.0 | 0.7 | 117.2 | 1.3 | 0.35 |

* The recovery of naphthalene was evaluated using the internal standard calibration method during analyses of field samples.

Table S2. Linear mixed effects model results for log transformed concentrations of total seventeen PAHs in wipe samples and sampling sites.

| Sampled site | Coefficient (ng/cm2) | Standard Error | P-value |
| --- | --- | --- | --- |
| Fire vehicle | 0.56 | 0.20 | 0.006 |
| Vehicle bay | 0.29 | 0.36 | 0.43 |
| PPEs cabinet | 0.02 | 0.36 | 0.96 |
| PPEs | 0.02 | 0.19 | 0.91 |
| Fire office | Reference |  |  |

Table S3. Summary concentrations of PAHs in wipe samples collected from four commercial offices (control). MDL=method detection limit. DF=detection frequency.

|  |  | Commercial office (n=12) | | |
| --- | --- | --- | --- | --- |
| Analyte | MDL (ng/cm2) | DF (%) | Median (ng/cm2) | Max (ng/cm2) |
| NAP | 0.003 | 0.0 | 0.002 | 0.002 |
| 2ACE | 0.004 | 0.0 | 0.003 | 0.003 |
| ACN | 0.005 | 0.0 | 0.004 | 0.004 |
| FLU | 0.002 | 0.0 | 0.002 | 0.002 |
| PHE | 0.002 | 100.0 | 0.029 | 0.043 |
| ANT | 0.002 | 8.3 | 0.002 | 0.022 |
| FLT | 0.003 | 0.0 | 0.002 | 0.002 |
| PYR | 0.003 | 0.0 | 0.002 | 0.002 |
| BaA | 0.003 | 0.0 | 0.002 | 0.002 |
| CHR | 0.003 | 0.0 | 0.002 | 0.002 |
| BbF | 0.007 | 0.0 | 0.005 | 0.005 |
| BkF | 0.004 | 0.0 | 0.003 | 0.003 |
| BaP | 0.007 | 0.0 | 0.005 | 0.005 |
| 3-MC | 0.014 | 0.0 | 0.010 | 0.010 |
| IcdP | 0.006 | 0.0 | 0.005 | 0.005 |
| DBA | 0.004 | 0.0 | 0.003 | 0.003 |
| BghiP | 0.007 | 0.0 | 0.005 | 0.005 |
| ∑17 PAHs |  |  | 0.085 | 0.098 |

Table S4. Grouped descriptive statistics for concentrations of total seventeen PAHs in wipe samples from three fire stations and four commercial offices (control). N=number of samples. SD=standard deviation.

| Sampled site | N | Mean | SD | median | Min | Max |
| --- | --- | --- | --- | --- | --- | --- |
| Fire vehicle | 36 | 7.97 | 6.00 | 5.90 | 1.76 | 31.60 |
| Vehicle bay | 3 | 4.23 | 3.75 | 2.21 | 1.93 | 8.56 |
| PPEs cabinet | 3 | 3.10 | 3.24 | 2.25 | 0.38 | 6.68 |
| Fire office | 9 | 3.05 | 2.71 | 2.07 | 0.09 | 7.21 |
| Commercial office (control) | 12 | 0.09 | 0.01 | 0.09 | 0.07 | 0.10 |

Table S5. Mann-Whitney U test results for concentrations of total seventeen PAHs in wipe samples from three fire stations and four commercial offices (control).

| Comparison | U Statistic | Unadjusted p-value | Bonferroni Adjusted p-value |
| --- | --- | --- | --- |
| Vehicle bay vs Fire office | 18 | 0.482 | 1.000 |
| Vehicle bay vs Commercial office (control) | 36 | 0.004 | 0.044 |
| Vehicle bay vs PPEs cabinet | 5 | 1.000 | 1.000 |
| Vehicle bay vs Fire vehicle | 25 | 0.140 | 1.000 |
| Fire office vs Commercial office (control) | 106 | 0.000 | 0.003 |
| Fire office vs PPEs cabinet | 14 | 1.000 | 1.000 |
| Fire office vs Fire vehicle | 67 | 0.007 | 0.073 |
| Commercial office (control) vs PPEs cabinet | 0 | 0.004 | 0.044 |
| Commercial office (control) vs Fire vehicle | 0 | 0.0000003 | 0.0000029 |
| PPEs cabinet vs Fire vehicle | 21 | 0.089 | 0.888 |

Table S6. Grouped descriptive statistics for concentrations of total seventeen PAHs in wipe samples from vehicles of three fire stations. N=number of samples. SD=standard deviation.

| Variable | N | Mean | SD | median | Min | Max |
| --- | --- | --- | --- | --- | --- | --- |
| Type |  |  |  |  |  |  |
| Command vehicle | 9 | 7.19 | 4.69 | 5.19 | 2.60 | 15.71 |
| Fire survey vehicle | 9 | 11.88 | 8.53 | 10.38 | 4.52 | 31.60 |
| Fire pump vehicle | 9 | 6.55 | 4.75 | 5.14 | 1.76 | 13.21 |
| Rescue vehicle | 9 | 6.28 | 4.08 | 4.12 | 2.40 | 13.74 |
| Sampling point |  |  |  |  |  |  |
| Ceiling | 12 | 5.45 | 3.54 | 4.57 | 1.76 | 13.21 |
| Floor | 12 | 12.37 | 7.07 | 11.78 | 2.65 | 31.60 |
| Seat | 12 | 6.10 | 4.48 | 4.60 | 2.29 | 16.87 |

Table S7. Wilcoxon signed-rank test results for concentrations of total seventeen PAHs in wipe samples from three fire stations by sampling point of vehicles.

| Comparison | Statistic | P-value |
| --- | --- | --- |
| Ceiling vs Floor | 8 | 0.012 |
| Ceiling vs Seat | 31 | 0.569 |
| Floor vs Seat | 10 | 0.021 |

Table S8. Grouped descriptive statistics for concentrations of total seventeen PAHs in wipe samples from PPEs of three fire stations. N=number of samples. SD=standard deviation.

| Type | Sampled point | N | Mean | SD | median | Min | Max |
| --- | --- | --- | --- | --- | --- | --- | --- |
| Turnout gear jacket | Internal surface of the inner layer | 7 | 2.25 | 3.39 | 0.58 | 0.06 | 9.51 |
|  | External surface of the outer layer | 7 | 3.82 | 4.06 | 1.78 | 0.42 | 11.66 |
| Turnout gear pants | Internal surface of the inner layer | 7 | 3.64 | 3.12 | 2.80 | 0.06 | 9.12 |
|  | External surface of the outer layer | 7 | 5.24 | 8.21 | 2.68 | 0.30 | 23.57 |
| Boots | External surface of the ankle | 6 | 26.35 | 29.81 | 20.19 | 1.43 | 78.06 |
|  | External surface of the outsole | 6 | 5.95 | 5.25 | 4.09 | 1.42 | 14.73 |
| Gloves | External surface of the palm side | 6 | 4.86 | 3.32 | 5.18 | 0.90 | 8.37 |
| Face shield | Internal surface | 6 | 2.89 | 3.13 | 2.75 | 0.06 | 8.59 |
|  | External surface | 6 | 2.08 | 3.29 | 1.05 | 0.06 | 8.73 |
| Helmet | External surface right side | 6 | 2.26 | 3.44 | 0.93 | 0.06 | 9.00 |
| SCBA | External surface of the air tank | 6 | 3.33 | 3.31 | 2.54 | 0.20 | 9.52 |

Table S9. Wilcoxon signed-rank test results for concentrations of total seventeen PAHs in wipe samples from PPEs of three fire stations.

| PPEs | Comparison | Statistic | P-value |
| --- | --- | --- | --- |
| Turnout gear jacket | Internal surface of the inner layer vs External surface of the outer layer | 0 | 0.016 |
| Turnout gear pants | Internal surface of the inner layer vs External surface of the outer layer | 11 | 0.688 |
| Boots | External surface of the ankle vs External surface of the outsole | 4 | 0.219 |
| Face shield | Internal surface vs outer surface | 3 | 0.225 |

Table S10. Percentage of median of each PAH to total seventeen PAHs on wipe samples from fire stations by sampling sites.

| Sampling site | NAP | ACE | ACN | FLU | PHE | ANT | FLT | PYR | BaA | CHR | BbF | BkF | BaP | 3-MC | IcdP | DBA | BghiP |
| --- | --- | --- | --- | --- | --- | --- | --- | --- | --- | --- | --- | --- | --- | --- | --- | --- | --- |
| [Vehicle, Surface of the floor] | 19.9 | 0.1 | 0.1 | 1.9 | 12.6 | 2.1 | 15.6 | 47.2 | 0.0 | 0.0 | 0.1 | 0.0 | 0.1 | 0.2 | 0.1 | 0.0 | 0.1 |
| [Vehicle, Surface of the ceiling] | 51.1 | 0.1 | 0.1 | 0.0 | 28.3 | 3.7 | 8.1 | 7.6 | 0.1 | 0.1 | 0.1 | 0.1 | 0.1 | 0.3 | 0.1 | 0.1 | 0.1 |
| [Vehicle, Surface of the seat] | 7.4 | 0.1 | 0.1 | 8.1 | 55.0 | 1.9 | 14.6 | 11.8 | 0.1 | 0.1 | 0.1 | 0.1 | 0.1 | 0.2 | 0.1 | 0.1 | 0.1 |
| [Apparatus bay, Surface of the floor] | 70.6 | 0.1 | 0.1 | 0.1 | 9.0 | 0.1 | 0.1 | 18.7 | 0.1 | 0.1 | 0.2 | 0.1 | 0.2 | 0.3 | 0.1 | 0.1 | 0.2 |
| [PPEs, Internal surface of the gear jacket] | 0.5 | 0.7 | 0.8 | 0.4 | 54.4 | 0.4 | 0.4 | 33.4 | 0.5 | 0.5 | 1.2 | 0.6 | 1.2 | 2.2 | 1.0 | 0.6 | 1.2 |
| [PPEs, External surface of the gear jacket] | 37.6 | 0.2 | 0.2 | 0.1 | 35.9 | 0.1 | 8.9 | 14.4 | 0.1 | 0.1 | 0.3 | 0.2 | 0.3 | 0.6 | 0.3 | 0.2 | 0.3 |
| [PPEs, Internal surface of the gear pants] | 36.4 | 0.3 | 0.3 | 0.1 | 35.1 | 0.1 | 8.8 | 15.2 | 0.2 | 0.2 | 0.5 | 0.3 | 0.5 | 0.9 | 0.4 | 0.2 | 0.5 |
| [PPEs, External surface of the gear pants] | 24.9 | 0.2 | 0.3 | 0.1 | 32.0 | 0.1 | 19.5 | 20.0 | 0.2 | 0.1 | 0.4 | 0.2 | 0.4 | 0.7 | 0.3 | 0.2 | 0.4 |
| [PPEs, Internal surface of the face shield] | 65.0 | 0.3 | 0.4 | 0.2 | 29.5 | 0.2 | 0.2 | 0.2 | 0.2 | 0.2 | 0.5 | 0.3 | 0.5 | 1.0 | 0.5 | 0.3 | 0.5 |
| [PPEs, External surface of the face shield] | 87.3 | 0.3 | 0.4 | 0.2 | 3.6 | 3.9 | 0.2 | 0.2 | 0.2 | 0.2 | 0.5 | 0.3 | 0.5 | 1.0 | 0.4 | 0.3 | 0.5 |
| [PPEs, External surface of the gloves palm side] | 25.8 | 0.1 | 0.2 | 0.1 | 49.3 | 7.1 | 5.7 | 10.1 | 0.1 | 0.1 | 0.2 | 0.1 | 0.2 | 0.4 | 0.2 | 0.1 | 0.2 |
| [PPEs, External surface of the SCBA air tank] | 71.4 | 0.2 | 0.2 | 0.1 | 20.3 | 0.1 | 0.1 | 4.9 | 0.1 | 0.1 | 0.3 | 0.2 | 0.3 | 0.6 | 0.3 | 0.2 | 0.3 |
| [PPEs, External surface of the boot ankle] | 4.8 | 0.1 | 0.1 | 0.0 | 18.7 | 4.1 | 0.0 | 4.4 | 67.2 | 0.0 | 0.1 | 0.0 | 0.1 | 0.2 | 0.1 | 0.0 | 0.1 |
| [PPEs, External surface of the boot sole] | 37.9 | 0.1 | 0.1 | 0.1 | 25.6 | 20.1 | 1.4 | 13.2 | 0.1 | 0.1 | 0.2 | 0.1 | 0.2 | 0.4 | 0.2 | 0.1 | 0.2 |
| [PPEs, External surface of the helmet] | 1.1 | 1.6 | 1.9 | 0.9 | 47.4 | 24.6 | 0.9 | 1.2 | 1.1 | 1.1 | 2.6 | 1.5 | 2.7 | 5.0 | 2.3 | 1.4 | 2.7 |
| [PPEs cabinet, Surface of the floor] | 80.7 | 0.1 | 0.2 | 0.1 | 8.6 | 0.1 | 2.6 | 5.8 | 0.1 | 0.1 | 0.2 | 0.1 | 0.2 | 0.5 | 0.2 | 0.1 | 0.2 |
| [Fire office, Surface of the floor] | 93.7 | 0.2 | 0.2 | 0.1 | 3.7 | 0.1 | 0.1 | 0.1 | 0.1 | 0.1 | 0.2 | 0.1 | 0.3 | 0.5 | 0.2 | 0.1 | 0.3 |
| Total | 33.7 | 1.2 | 4.5 | 1.8 | 21.6 | 5.6 | 7.9 | 11.4 | 2.2 | 2.7 | 1.3 | 1.1 | 1.1 | 1.7 | 0.7 | 0.4 | 1.0 |

Table S11. Linear mixed effects model results for the ratios of high molecular weight PAHs concentration to the total seventeen PAHs concentrations in wipe samples.

| Sampled site | Coefficient | Standard Error | P-value |
| --- | --- | --- | --- |
| PPEs cabinet | -0.52 | 0.19 | 0.005 |
| Fire office | -0.50 | 0.14 | 0.000 |
| External surface of the boot outsole | -0.45 | 0.15 | 0.003 |
| Ceiling of the vehicle | -0.45 | 0.13 | 0.001 |
| External surface of the face shield | -0.44 | 0.15 | 0.004 |
| Apparatus bay | -0.41 | 0.19 | 0.025 |
| Seat of the vehicle | -0.38 | 0.13 | 0.004 |
| External surface of the helmet | -0.31 | 0.15 | 0.044 |
| External surface of the gloves palm side | -0.30 | 0.15 | 0.050 |
| External surface of the turnout gear jacket | -0.26 | 0.15 | 0.076 |
| Internal surface of the turnout gear jacket | -0.26 | 0.15 | 0.077 |
| Internal surface of the face shield | -0.26 | 0.15 | 0.090 |
| External surface of the SCBA air tank | -0.23 | 0.15 | 0.132 |
| Internal surface of the turnout gear pants | -0.20 | 0.15 | 0.165 |
| Floor of the vehicle | -0.12 | 0.13 | 0.374 |
| External surface of the turnout gear pants | -0.10 | 0.15 | 0.476 |
| External surface of the boot ankle | Reference |  |  |
